# 1 Revolutionising Public Health Reference Microbiology 2 using Whole Genome Sequencing: *Salmonella* as an 3 exemplar

4

5

---

## 6 Authors

7 Philip Ashton, Satheesh Nair, Tansy Peters, Rediat Tewolde, Martin Day, Michel Doumith,  
8 Jonathan Green, Claire Jenkins, Anthony Underwood, Catherine Arnold, Elizabeth de Pinna, Tim  
9 Dallman, Kathie Grant

10

11

---

## 12 ABSTRACT

13

14 Advances in whole genome sequencing (WGS) platforms and DNA library preparation have led to the  
15 development of methods for high throughput sequencing of bacterial genomes at a relatively low  
16 cost (Loman et al. 2012; Medini et al. 2008). WGS offers unprecedented resolution for determining  
17 degrees of relatedness between strains of bacterial pathogens and has proven a powerful tool for  
18 microbial population studies and epidemiological investigations (Harris et al. 2010; Lienau et al.  
19 2011; Holt et al. 2009; Ashton, Peters, et al. 2015). The potential utility of WGS to public health  
20 microbiology has been highlighted previously (Köser et al. 2012; Kwong et al. 2013; Reuter et al.  
21 2013; Joensen et al. 2014; Nair et al. 2014; Bakker et al. 2014; D’Auria et al. 2014). Here we report,  
22 for the first time, the routine use of WGS as the primary test for identification, surveillance and  
23 outbreak investigation by a national reference laboratory. We present data on how this has  
24 revolutionised public health microbiology for one of the most common bacterial pathogens in the  
25 United Kingdom, the *Salmonellae*.

26

27

---

## 28 DATA SUMMARY

29

- 30 1. PHE Salmonella sequencing data is deposited in the Sequence Read Archive in  
31 BioProject PRJNA248792.

32

33 **I/We confirm all supporting data, code and protocols have been provided within the  
34 article or through supplementary data files. ☒**

35

36

37

38

39

---

## 40 IMPACT STATEMENT

41

42 The first human genome cost around \$3 billion, and took around 10 years to complete. Advances in  
43 DNA sequencing technology (also referred to as whole genome sequencing (WGS)) allow the same  
44 feat to be accomplished today for less than \$10000 and less than 2 weeks. This remarkable  
45 improvement in technology has also led to a step change in microbiology, increasing our  
46 understanding of the evolution of major human pathogens such as *Yersinia pestis*, *Salmonella* Typhi  
47 and *Mycobacterium tuberculosis*. While these kinds of academic studies provide unparalleled  
48 context for public health action, until now, this approach has not been routinely employed at the  
49 frontline. At Public Health England, WGS has been implemented for routine public health  
50 identification, characterisation and typing of an important human pathogen, *Salmonella*, replacing  
51 methods that have changed little over the last 100 years. Analysis of WGS data has identified  
52 outbreaks that were previously undetectable and been used to infer rare antimicrobial resistance  
53 patterns. This paper will serve as a notification to the community of the methods PHE are using, and  
54 will be of great use to other public health labs considering switching to WGS.

55

56

---

## 57 INTRODUCTION

58 Governments have a long history of intervening on behalf of the public health. In the 19<sup>th</sup> Century  
59 public health initiatives sprang up to combat the main afflictions of the day, which were primarily  
60 microbiological. In the UK, Edwin Chadwick spearheaded a movement that resulted in the passage of  
61 the Public Health Act 1848. One of Chadwick's primary goals was to disperse the 'miasma', or  
62 polluted air, that was then held cause diseases such as cholera and chlamydia. This was to be  
63 achieved by draining the 30 000 cesspools of London into the river Thames. Unfortunately, the  
64 Thames was also the primary source of drinking water for the city at that time. Thus, one of the first  
65 modern public health interventions contributed to a dramatic increase in cholera rates in the city  
66 (Johnson 2006). While John Snow, Louis Pasteur and Robert Koch soon placed microbiological public  
67 health on a firmer footing than 'miasma', the dangers of basing public health action on inaccurate,  
68 or out of date, science remain.

69

70 Here, we present the experience of a national reference lab that has undergone a transformation  
71 from a traditional serotyping laboratory to a state of the art whole genome sequencing laboratory.  
72 As we are the first national reference laboratory to do this for *Salmonella*, we believe that relating  
73 our experience and approach will be valuable for the wider community.

74

75

76

---

## 77 **Traditional approach to reference microbiology for *Salmonella*** 78 **species**

79

80 Approximately 10,000 *Salmonella* isolates are referred to the Gastrointestinal Bacterial Reference  
81 Unit (GBRU), Public Health England (PHE) each year. Prior to April 2015, all presumptive *Salmonella*  
82 isolates received were speciated and sub-speciated using real-time PCR (RT-PCR) (Katie L. Hopkins et  
83 al. 2011) and phenotypic arrays (Omnilog). Serological classification, as described in the White-  
84 Kauffman-Le Minor scheme (Grimont & Weill 2008), utilises the phenotypic variation seen in  
85 flagellar, polysaccharide and capsular antigens, was then used to provide further resolution.  
86 *Salmonella* resolves into more than 2600 serotypes according to their antigenic formulae and the  
87 procedure relies upon the production of numerous antisera raised in rabbits following a precise  
88 immunisation programme. The incidence of different *Salmonella* serotypes identified in the UK is not  
89 uniform with only 10 serotypes accounting for approximately 70% of the isolates received by GBRU  
90 (Figure 1). Serotyping did not always provide the level of strain discrimination required for outbreak  
91 investigation, and was complimented with phage-typing (Callow 1959) and reactive (i.e. not routine  
92 for all isolates) molecular methods such as Multi Locus Variable number of tandem repeats Analysis  
93 (MLVA) (K. L. Hopkins et al. 2011) or Pulsed-Field Gel Electrophoresis (PFGE) (Peters 2009).

94

95

96

97

---

## 98 **WGS approach to reference microbiology for *Salmonella* species**

99

### 100 *Genome sequencing*

101 Since April 2015, WGS has been the one procedure performed on all cultures of *Salmonella sp.*  
102 referred to GBRU by frontline hospital microbiology laboratories, private laboratories and food,  
103 water and environmental laboratories. All other typing methods previously employed have been  
104 significantly reduced or withdrawn. On receipt, original cultures are directly inoculated into 750 µl of  
105 nutrient broth and incubated overnight at 37°C. DNA extraction is performed using the  
106 Qiasymphony automated DNA extractor (Qiagen) and DNA is quantified using the Glomax  
107 (Promega). DNA is submitted to the central Genomic Sequencing and Development Unit at PHE,  
108 where Illumina Nextera XT DNA libraries are constructed and sequenced using the Illumina HiSeq  
109 2500 in fast mode. The samples are then deplexed by Casava software and Trimmomatic (Bolger et

110 al. 2014) used to trim any data with a phred score less than Q30 from the beginning and end of the  
111 reads. The outline of this process can be seen in Figure 2.

112

### 113 *Bacterial identification and serogroup designation*

114 A sample of k-mers (DNA sequences of length k) in the sequence data are compared against the k-  
115 mers of 1769 reference genomes representing 59 pathogenic genera obtained from RefSeq. The  
116 closest percentage match is identified, and provides initial confirmation of the species and sub-  
117 species of *Salmonella*. This step also identifies samples containing more than one species of bacteria  
118 (i.e. mixed cultures) and any bacteria misidentified as *Salmonella* by the sending laboratory.

119

120 Once the sample is confirmed as *Salmonella*, the sequenced genome is interrogated with sequences  
121 in the Multi Locus Sequence Typing (MLST) database (Achtman et al. 2012) using a modified version  
122 of SRST (Inouye et al. 2012). This provides a quality assessed sequence type (ST). Achtman *et al* have  
123 shown that *Salmonella* serotypes generally belong to clonal complexes of related Sequence Types  
124 (ST) known as e-burst groups (EBGs) and have described the correlation between EBGs and serotype  
125 (Achtman et al. 2012). At PHE a database containing matched MLST data and phenotypic serotype  
126 designation for more than 12000 isolates of *Salmonella* allows us to infer a serogroup from the  
127 sequence type with 96% accuracy (Ashton, Nair, et al. 2015). The primary error types are (i) two  
128 different serotypes having the same ST, e.g. ST 909 is both *Salmonella* Richmond and *Salmonella*  
129 Bareilly (ii) processing errors and (iii) inaccuracy in serotype designation of public data (Ashton, Nair,  
130 et al. 2015). The inferred serotype is then reported back to the sending laboratory, along with the ST  
131 of the isolate, to maintain backwards compatibility with historical data. This provides customers with  
132 a consistent service and facilitates data exchange with Public Health colleagues both locally and  
133 internationally, as well as others in the veterinary, food, water and environmental microbiology  
134 disciplines.

135

### 136 *Outbreak detection and investigation*

137 Over 70% of isolates received by GBRU belong to the most common 14 serotypes and, as with  
138 serotype, ST alone is not discriminatory enough for outbreak detection and public health  
139 investigation. Whole genome single nucleotide polymorphism (SNP) typing is performed on samples  
140 that belong to the most common e-burst groups. This involves mapping the sequence reads to an  
141 appropriate reference genome (within the same e-burst group) using BWA mem (Li & Durbin 2009),  
142 before identifying SNPs with GATK (DePristo et al. 2011). High quality SNPs are then stored in a

143 database where they can be queried to generate sequence alignments for input into phylogenetic  
144 algorithms.

145

146 Within PHE, outbreaks of *Salmonella* were traditionally detected using an exceedance algorithm  
147 (Noufaily et al. 2013) based on serotyping and phage typing data. The lack of discrimination  
148 associated with these typing techniques results in a high false positive rate of exceedance  
149 notifications (Noufaily et al. 2013). In contrast, whole genome SNP typing offers unprecedented  
150 resolution in linking cases providing added certainty to outbreak definitions, transmission networks  
151 and other aspects of the underlying epidemiology.

152

153 A hierarchical ‘SNP address’ approach is employed that groups isolates together into clusters of  
154 increasing levels of similarity. The pairwise SNP distance is calculated for each pair of isolates in the  
155 analysis set. This distance matrix is then subjected to single linkage clustering at 250, 100, 50, 25, 10,  
156 5 and 0 SNPs. The end result is a SNP address that identifies clusters of isolates at each level of the  
157 hierarchy (Figure 3). The SNP address approach for identifying epidemiologically significant clusters  
158 (i.e. outbreaks) correlates well with existing workflows and is phylogenetically informative, as all  
159 isolates are placed into haplotypes derived from a phylogeny of the clonal complex in question.

160

161 Median turn around time from the receipt of a sample at the reference laboratory to a reported,  
162 WGS based, result over the last 4 weeks before submission of this manuscript (weeks 43-46, 2015)  
163 months was 10 working days (David Powell, PHE, personal communication). Once an outbreak has  
164 been identified it is important to confirm additional cases quickly in order to expedite  
165 epidemiological investigations. To this end we are exploring the use of WGS data to design  
166 outbreak/incident-specific RT-PCR or High Resolution Melt assays to screen additional referred  
167 cultures as being part of specific outbreaks based on SNPs that are unique to this cluster. Then, in  
168 the case of an incident, all samples could be rapidly screened upon receipt to ascertain if they are  
169 part of the outbreak. Epidemiological investigation could then proceed in a more timely fashion.  
170 These isolates could be sequenced as a matter of urgency using a MinION device (Oxford Nanopore  
171 Technologies), for example, which could confirm the isolate as being part of a known outbreak, or  
172 not (Quick et al. 2015) (PMID 26025440).

173

#### 174 *Further microbiological characterisation*

175 One of the most attractive aspects of WGS is the fact that it lends itself to a ‘single process, multiple  
176 tests’ approach. For example, once you have generated the sequence in order to do whole genome

177 SNP typing, the data is available in perpetuity for other tests, e.g. characterisation of virulence and  
178 other molecular markers e.g. of antimicrobial resistance. Known antimicrobial resistance  
179 determinants can be readily identified from WGS data. We carried out a pilot study to compare  
180 genotypic vs phenotypic resistance typing in 642 *Salmonellae* of which 57.5% were susceptible and  
181 24.7% MDR. Results showed a greater than 99% success rate (unpublished data) indicating the  
182 potential of adding this into the routine *Salmonella* work flow. Phenotypic screening could be used  
183 on a small proportion of isolates in order to detect novel or emerging resistance mechanisms. The  
184 fact that the data is available in perpetuity allows re-testing when e.g. novel resistance mechanisms  
185 emerge.

186

#### 187 *Data sharing*

188 The genomic data of all *Salmonella* sequenced at PHE is publically released into the NCBI BioProject  
189 PRJNA248792 within two weeks of the sample report date. The prompt release of data is to facilitate  
190 international tracking and surveillance of food and waterborne, gastrointestinal pathogens in far-  
191 reaching distribution networks (Byrne et al. 2015). Globally, national surveillance organizations, such  
192 as the Food and Drug Administration and the United States Centre for Disease Control, are also  
193 uploading *Salmonella* genomes from their surveillance activities into public sequence archives.  
194 Algorithms that enable the timely and sensitive comparison of these datasets are a high priority, as  
195 this will be needed to monitor international patterns in gastrointestinal infection. While meta-data is  
196 limited for privacy reasons, publically releasing the data provides a great resource for academic  
197 researchers interested in gastrointestinal pathogens.

198

#### 199 *Infrastructure requirements and challenges*

200 WGS is obviously a very exciting technology, however it is one that requires substantial investment in  
201 infrastructure. Public Health England have invested millions in sequencing and molecular biology  
202 hardware, high performance computing and staff costs (wet lab and bioinformaticians) to deliver this  
203 service. There are also many challenges involved in changing skillsets and mindsets. Practical  
204 implementation and integration across different departments (microbiology, sequencing,  
205 bioinformatics and epidemiology) is also a challenge, but necessary to ensure the success of a  
206 project such as this.

207

208

209

---

## 210 **Future perspectives**

211

212 It is an exciting time to work in microbiology and genomics. Even before the repercussions of one  
213 revolution (short read, whole genome sequencing) have had their full impact on reference and  
214 clinical microbiology, another revolution (long read, portable sequencing) is on the horizon. Exactly  
215 how this second revolution will affect clinical and reference microbiology is currently unclear but  
216 two obvious applications present themselves. Firstly, the ability to fully assemble large numbers of  
217 genomes could provide a step-change in resolution for determining whether two genomes are  
218 related. Currently, it is the core genome that is the focus of the majority of genomic epidemiology.  
219 Being able to analyse the entire genome provides opportunities for using the accessory genome to  
220 determine how related two isolates are. However, this approach needs to be thoroughly  
221 investigated and assessed for sensitivity and specificity as compared with a core genome approach.  
222 We need to be mindful that the dynamic accessory genome could be misleading as to the  
223 relatedness of isolates (Lauren Cowley, PHE, personal communication). The other application of this  
224 new wave of sequencers comes from their portability and low profile infrastructure requirements.  
225 Many smaller hospitals and front line laboratories could not justify setting up the infrastructure  
226 required to run a large machine as they are unlikely to perform enough sequencing to make it  
227 economically viable. However, it would be feasible to employ smaller devices like the MinION and  
228 use them to sequence suspect outbreak strains. The data could be streamed to a repository  
229 maintained by the reference laboratory where the SNPs identified in the sample could be used to  
230 place the sample onto a tree and call it as outbreak or non-outbreak (Figure 4). This approach has  
231 already been used in an outbreak situation (Quick et al. 2015). There is a big question for many  
232 organisations as to whether to invest heavily now in proven, 'work-horse' machines, or to hold on  
233 for exciting new technologies to mature, with the potential increases in throughput and decrease in  
234 cost promised by these 'third generation', or 'third revolution' (Loman & Pallen 2015), technologies.

235

236

237

238

## 239 CONCLUSION

240

241 WGS for routine public health surveillance offers a host of scientific, technical and economic  
242 advantages compared with conventional microbiological methods. A single, highly automatable  
243 process provides speciation, identification, typing and characterization to a level at least equivalent,  
244 and often superior, to the previous 'gold-standard' techniques. In addition, the data is uniquely  
245 portable, allowing rapid comparison with other public health institutions and re-use by the wider  
246 scientific community.

247



248

---

## 249 ACKNOWLEDGEMENTS

250

251 We would like to acknowledge the contribution of everyone working in the Salmonella  
252 Reference Service, the Genome Sequencing and Development Unit and Infectious Disease  
253 Informatics at Public Health England, for their invaluable contributions to this work. We  
254 would also like to thank Nick Loman for significant contribution toward figure 4.

255

256

---

## 257 ABBREVIATIONS

258

259

260

---

## 261 REFERENCES

262

263 Achtman, M. et al., 2012. Multilocus Sequence Typing as a Replacement for Serotyping in  
264 *Salmonella enterica*. *PLoS pathogens*, 8(6), p.e1002776. Available at:  
265 [http://www.pubmedcentral.nih.gov/articlerender.fcgi?artid=3380943&tool=pmcentrez](http://www.pubmedcentral.nih.gov/articlerender.fcgi?artid=3380943&tool=pmcentrez&rendertype=abstract)  
266 [&rendertype=abstract](http://www.pubmedcentral.nih.gov/articlerender.fcgi?artid=3380943&tool=pmcentrez&rendertype=abstract) [Accessed July 20, 2012].

267 Ashton, P.M., Nair, S., et al., 2015. Identification and typing of Salmonella for public health.  
268 *PeerJ PrePrints*, 3(April), p.e1778.

269 Ashton, P.M., Peters, T., et al., 2015. Whole Genome Sequencing for the Retrospective  
270 Investigation of an Outbreak of Salmonella Typhimurium DT 8. *PLoS Currents*. Available  
271 at: <http://currents.plos.org/outbreaks/?p=46522>.

272 Bakker, H.C. Den et al., 2014. Rapid Whole-Genome Sequencing for Surveillance of  
273 *Salmonella enterica* Serovar Enteritidis. *Emerging infectious diseases*, 20(8), pp.1306–  
274 14. Available at:  
275 [http://www.pubmedcentral.nih.gov/articlerender.fcgi?artid=4111163&tool=pmcentrez](http://www.pubmedcentral.nih.gov/articlerender.fcgi?artid=4111163&tool=pmcentrez&rendertype=abstract)  
276 [&rendertype=abstract](http://www.pubmedcentral.nih.gov/articlerender.fcgi?artid=4111163&tool=pmcentrez&rendertype=abstract).

277 Bolger, A.M., Lohse, M. & Usadel, B., 2014. Trimmomatic: a flexible trimmer for Illumina  
278 sequence data. *Bioinformatics (Oxford, England)*, pp.1–7. Available at:  
279 <http://www.ncbi.nlm.nih.gov/pubmed/24695404>.

280 Byrne, L. et al., 2015. A multi-country outbreak of Salmonella Newport gastroenteritis in  
281 Europe associated with watermelon from Brazil , confirmed by whole genome  
282 sequencing : October 2011 to January 2012. *Euro surveillance : bulletin Européen sur les*  
283 *maladies transmissibles = European communicable disease bulletin*, 19(31), pp.6–13.

284 Callow, B.R., 1959. A new phage-typing scheme for Salmonella Typhimurium. *The Journal of*  
285 *hygiene*, 57, pp.346–359.



- 286 D’Auria, G., Schneider, M.V. & Moya, A., 2014. Live genomics for pathogen monitoring in  
287 public health. *Pathogens (Basel, Switzerland)*, 3(1), pp.93–108. Available at:  
288 <http://www.pubmedcentral.nih.gov/articlerender.fcgi?artid=4235738&tool=pmcentrez>  
289 &rendertype=abstract.
- 290 DePristo, M.A. et al., 2011. A framework for variation discovery and genotyping using next-  
291 generation DNA sequencing data. *Nature ...*, 43(5), pp.491–498. Available at:  
292 <http://www.nature.com/ng/journal/vaop/ncurrent/full/ng.806.html> [Accessed January  
293 6, 2014].
- 294 Grimont, P. & Weill, F.-X., 2008. *Antigenic formulae of the Salmonella servovars*, WHO  
295 Collaborating Centre for Reference and Research on Salmonella. Available at:  
296 [http://www.pasteur.fr/ip/portal/action/WebdriveActionEvent/oid/01s-000036-](http://www.pasteur.fr/ip/portal/action/WebdriveActionEvent/oid/01s-000036-089\npapers2://publication/uuid/CA3447A0-61BF-4D62-9181-C9BA78AF0312)  
297 [089\npapers2://publication/uuid/CA3447A0-61BF-4D62-9181-C9BA78AF0312](http://www.pasteur.fr/ip/portal/action/WebdriveActionEvent/oid/01s-000036-089\npapers2://publication/uuid/CA3447A0-61BF-4D62-9181-C9BA78AF0312).
- 298 Harris, S.R. et al., 2010. Evolution of MRSA During Hospital Transmission and  
299 Intercontinental Spread. , 327(5964), pp.1–11.
- 300 Holt, K.E. et al., 2009. High-throughput sequencing provides insights into genome variation  
301 and evolution in Salmonella Typhi. *Nature Genetics*, 40(8), pp.987–993.
- 302 Hopkins, K.L. et al., 2011. A novel real-time polymerase chain reaction for identification of  
303 Salmonella enterica subspecies enterica. *Diagnostic Microbiology and Infectious*  
304 *Disease*, 70(2), pp.278–280. Available at:  
305 <http://dx.doi.org/10.1016/j.diagmicrobio.2011.01.015>.
- 306 Hopkins, K.L. et al., 2011. Standardisation of multilocus variable-number tandemrepeat  
307 analysis (MLVA) for subtyping of Salmonella enterica serovar Enteritidis.  
308 *Eurosurveillance*, 16(32), pp.1–11.
- 309 Inouye, M. et al., 2012. Short read sequence typing (SRST): multi-locus sequence types from  
310 short reads. *BMC genomics*, 13(1), p.338. Available at:  
311 <http://www.pubmedcentral.nih.gov/articlerender.fcgi?artid=3460743&tool=pmcentrez>  
312 &rendertype=abstract [Accessed March 9, 2013].
- 313 Joensen, K.G. et al., 2014. Real-time whole-genome sequencing for routine typing,  
314 surveillance, and outbreak detection of verotoxigenic Escherichia coli. *Journal of clinical*  
315 *microbiology*, 52(5), pp.1501–10. Available at:  
316 <http://www.pubmedcentral.nih.gov/articlerender.fcgi?artid=3993690&tool=pmcentrez>  
317 &rendertype=abstract [Accessed May 27, 2014].
- 318 Johnson, S., 2006. *The Ghost Map*, Tantor Media, Inc.
- 319 Köser, C.U. et al., 2012. Routine Use of Microbial Whole Genome Sequencing in Diagnostic  
320 and Public Health Microbiology G. F. Rall, ed. *PLoS Pathogens*, 8(8), p.e1002824.

- 321 Available at: <http://dx.plos.org/10.1371/journal.ppat.1002824> [Accessed August 3,  
322 2012].
- 323 Kwong, J.C. et al., 2013. Whole genome sequencing in diagnostic and public health  
324 microbiology. *Pathology*, 47(May), p.2013.
- 325 Li, H. & Durbin, R., 2009. Fast and accurate short read alignment with Burrows-Wheeler  
326 transform. *Bioinformatics (Oxford, England)*, 25(14), pp.1754–60. Available at:  
327 <http://www.pubmedcentral.nih.gov/articlerender.fcgi?artid=2705234&tool=pmcentrez>  
328 &rendertype=abstract [Accessed August 6, 2013].
- 329 Lienau, E. et al., 2011. Identification of a salmonellosis outbreak by means of molecular  
330 sequencing. ... *England Journal of ...*, 364, pp.981–982. Available at:  
331 <http://www.nejm.org/doi/full/10.1056/NEJMc1100443> [Accessed July 5, 2013].
- 332 Loman, N.J. et al., 2012. Performance comparison of benchtop high-throughput sequencing  
333 platforms. *Nature Biotechnology*, 2012(March). Available at:  
334 <http://www.nature.com/doi/10.1038/nbt.2198> [Accessed April 22, 2012].
- 335 Loman, N.J. & Pallen, M.J., 2015. Twenty years of bacterial genome sequencing. *Nature*  
336 *Reviews Microbiology*, (November), pp.1–9. Available at:  
337 <http://www.nature.com/doi/10.1038/nrmicro3565>.
- 338 Medini, D. et al., 2008. Microbiology in the post-genomic era. *Nature reviews. Microbiology*,  
339 6(6), pp.419–430.
- 340 Nair, S. et al., 2014. Salmonella enterica subspecies II infections in England and Wales - The  
341 use of multilocus sequence typing to assist serovar identification. *Journal of Medical*  
342 *Microbiology*, 63(PART 6), pp.831–834.
- 343 Noufaily, A. et al., 2013. An improved algorithm for outbreak detection in multiple  
344 surveillance systems. *Statistics in medicine*, 32(7), pp.1206–22. Available at:  
345 <http://www.ncbi.nlm.nih.gov/pubmed/22941770> [Accessed June 6, 2014].
- 346 Peters, T.M., 2009. Pulsed-Field Gel Electrophoresis for Molecular Epidemiology of Food  
347 Pathogens. In pp. 59–70. Available at: [http://link.springer.com/10.1007/978-1-60327-](http://link.springer.com/10.1007/978-1-60327-999-4_6)  
348 [999-4\\_6](http://link.springer.com/10.1007/978-1-60327-999-4_6).
- 349 Quick, J. et al., 2015. Rapid draft sequencing and real-time nanopore sequencing in a  
350 hospital outbreak of Salmonella. *Genome Biology*, 16(1), pp.1–14. Available at:  
351 <http://genomebiology.com/2015/16/1/114>.
- 352 Reuter, S. et al., 2013. Rapid bacterial whole-genome sequencing to enhance diagnostic and  
353 public health microbiology. *JAMA internal medicine*, 173(15), pp.1397–404. Available  
354 at:  
355 <http://www.pubmedcentral.nih.gov/articlerender.fcgi?artid=4001082&tool=pmcentrez>

356 &rendertype=abstract.

357

358

359 **FIGURES AND TABLES**

360

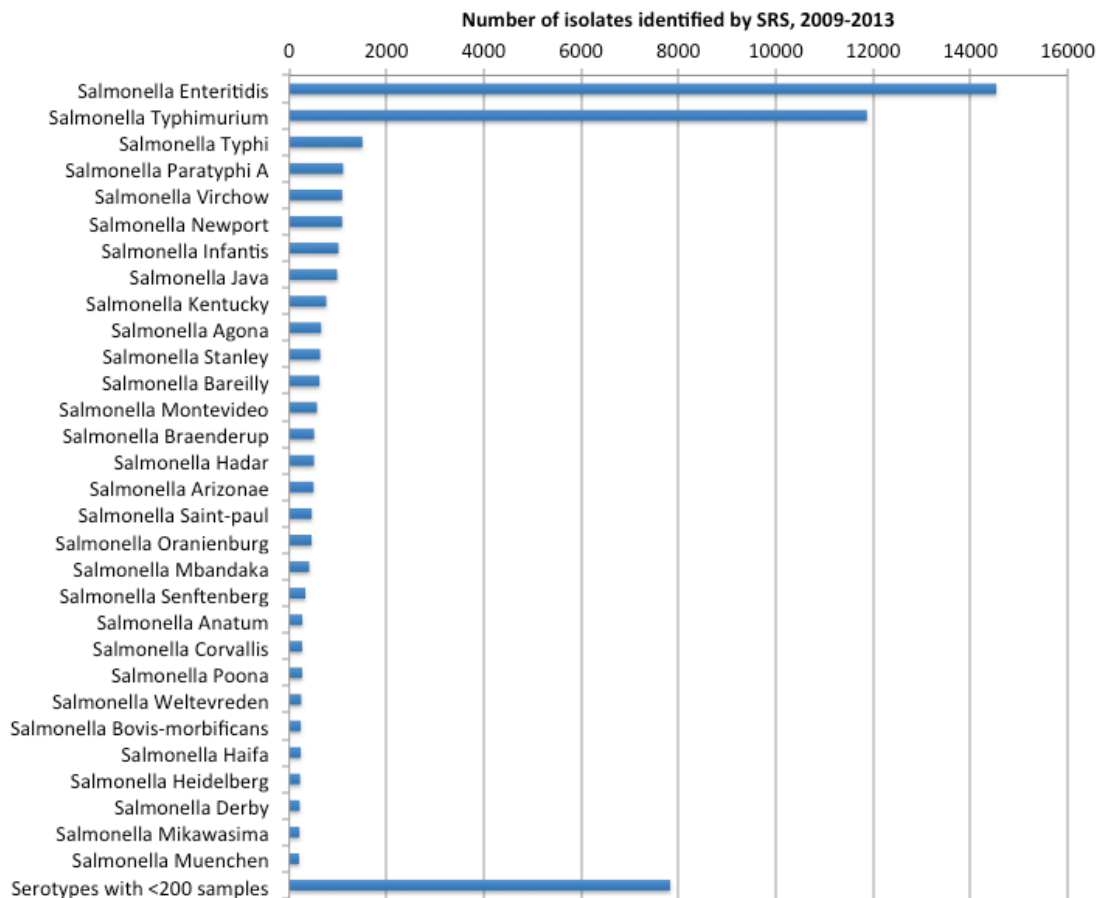

361

362

363 **Figure 1: Serotypes with more than 200 isolates received in the 4 year period 2009-2013 by**

364 **Salmonella Reference Service, Public Health England.**

365

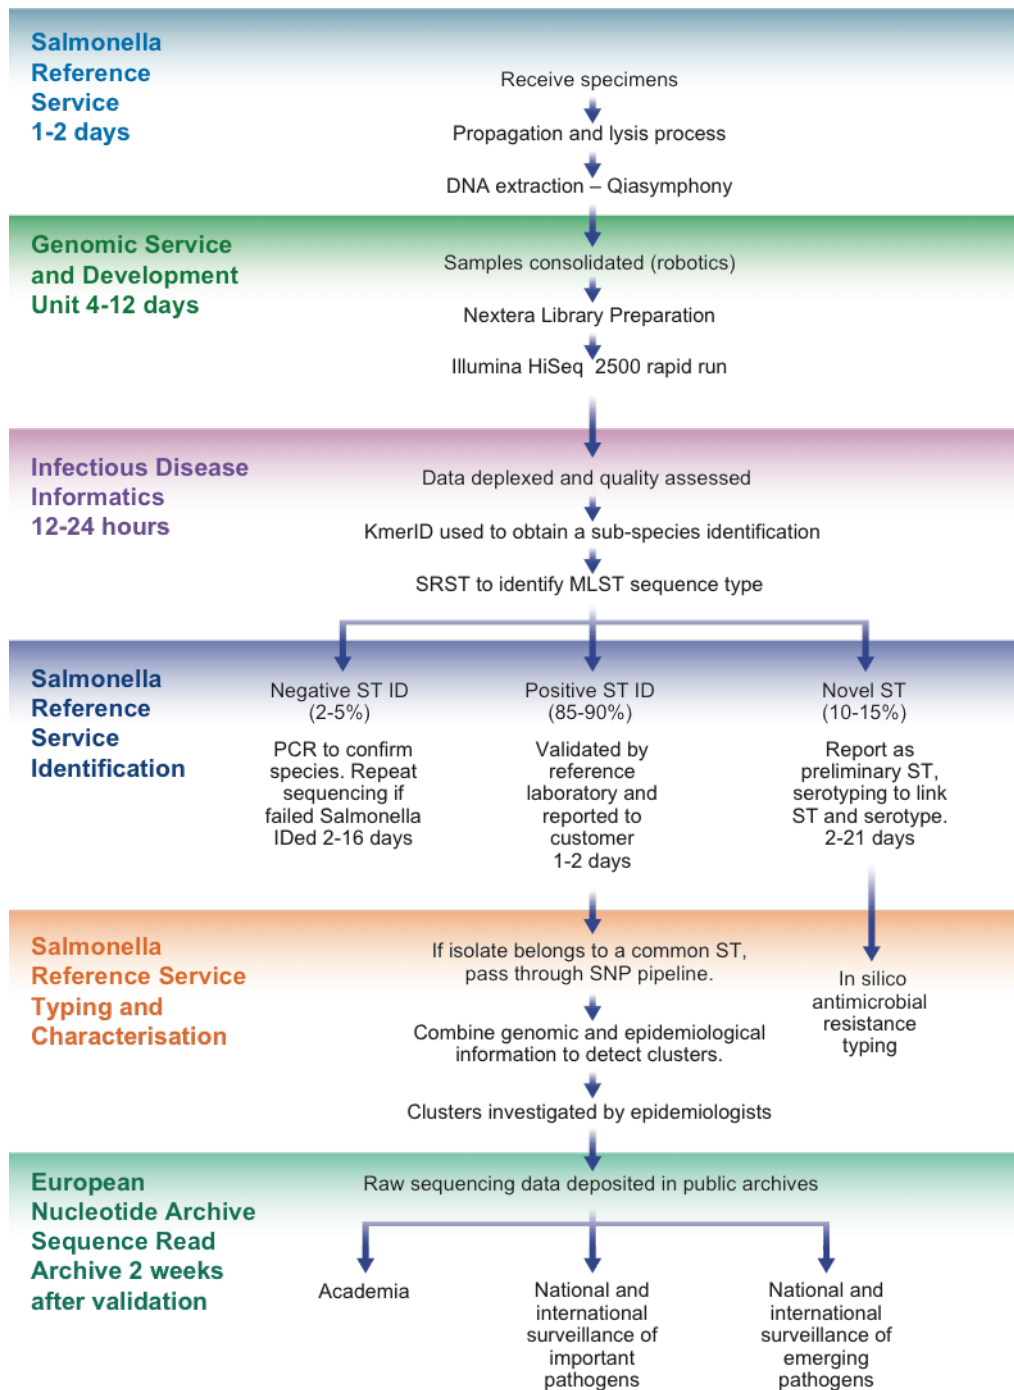

366

367 **Figure 2: The current workflow for the use of whole genome sequencing by the Public Health**

368 **England Salmonella Reference Service**

369

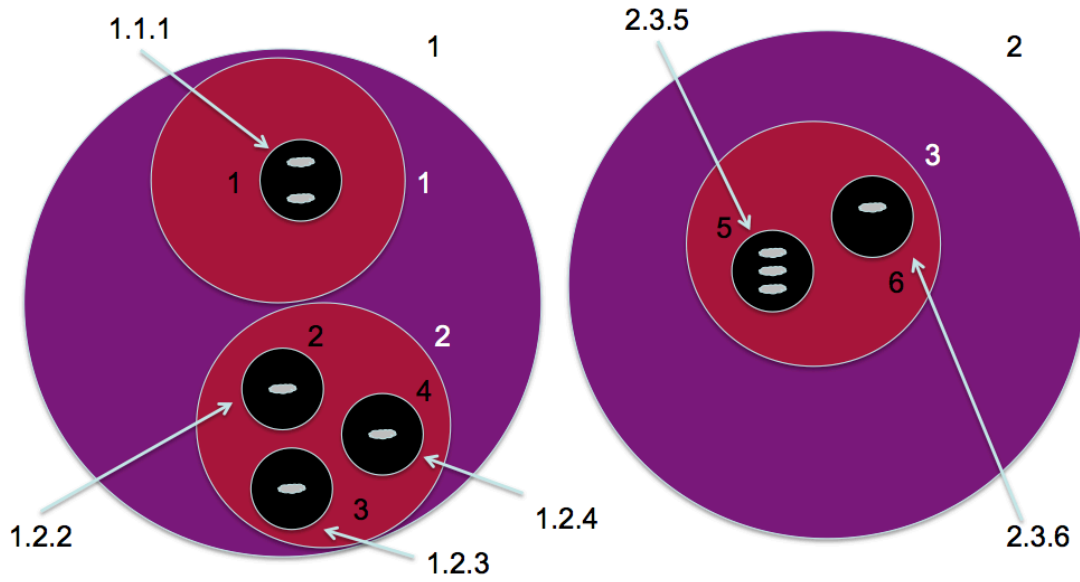

370  
 371 **Figure 3: Schematic of how the SNP address works**  
 372

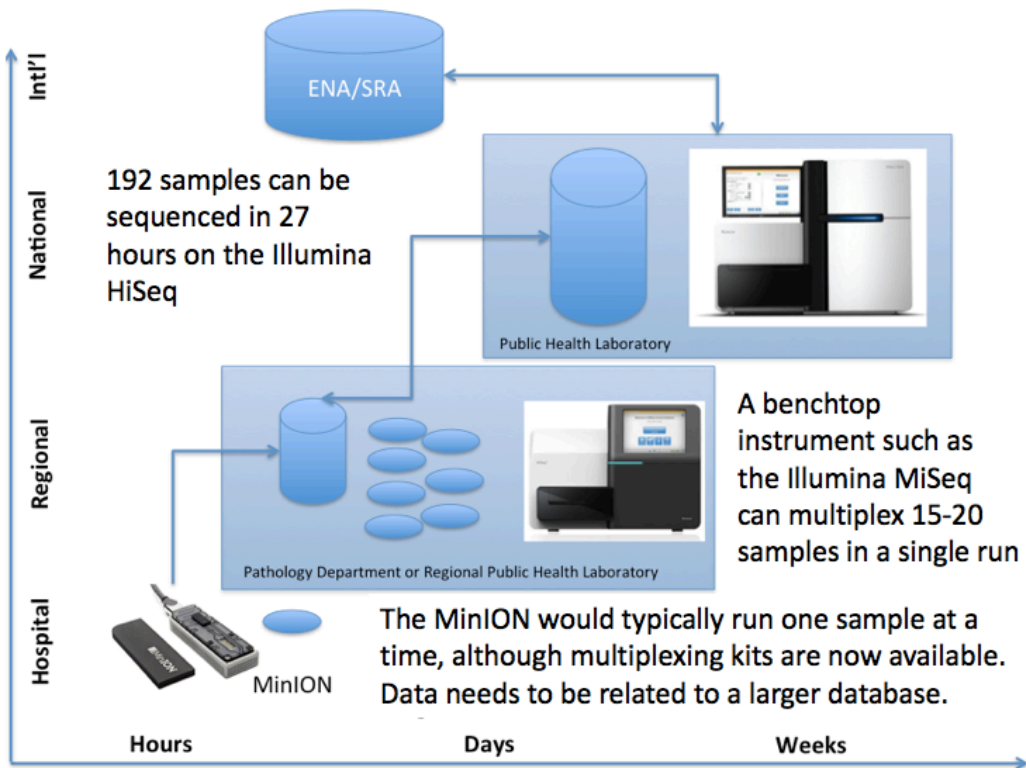

373  
 374 **Figure 4: Example of future public health workflow**  
 375  
 376  
 377
